# Supplementary material for: C9ORF72 repeat expansion causes vulnerability of motor neurons to Ca2+-permeable AMPA receptor-mediated excitotoxicity
Source: PubMed Central journal article supplement (PMC5783946; doi:10.1038/s41467-017-02729-0), 2018-01-24
Supplement: 41467_2017_2729_MOESM1_ESM.pdf [file 41467_2017_2729_MOESM1_ESM.pdf]

## Supplementary Figure 1

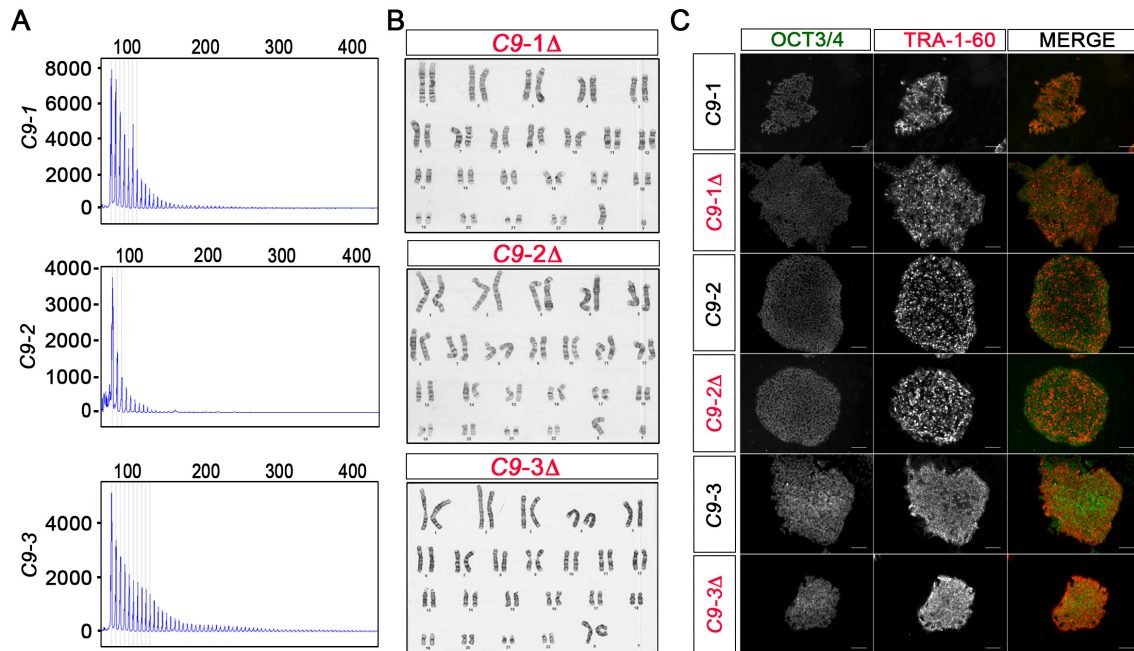**D**

**C9-gRNA-1 sequence : AACTCAGGAGTCGCGCGCTA**

**C9\_Fw\_chr2:-231921408 : AGGTCAGGAGTCCGCGCAA**

**Control** AAACCTCCTCGAGGTCAGGAGTCCCGCGCAACGGAACACTGGTCT

**C9-1Δ** AAACCTCCTCGAGGTCAGGAGTCCCGCGCAACGGAACACTGGTCT

**C9-2Δ** AAACCTCCTCGAGGTCAGGAGTCCCGCGCAACGGAACACTGGTCT

**C9-3Δ** AAACCTCCTCGAGGTCAGGAGTCCCGCGCAACGGAACACTGGTCT

\*\*\*\*\*

**C9\_Fw\_chr7:-151551819 : ATCACAGGAGGCGCGCCCTA**

**Control** GTTGTGTGAGAATCACAGGAGGCGCGCCCTAAGGACCAGGCACCC

**C9-1Δ** GTTGTGTGAGAATCACAGGAGGCGCGCCCTAAGGACCAGGCACCC

**C9-2Δ** GTTGTGTGAGAATCACAGGAGGCGCGCCCTAAGGACCAGGCACCC

**C9-3Δ** GTTGTGTGAGAATCACAGGAGGCGCGCCCTAAGGACCAGGCACCC

\*\*\*\*\*

**C9-gRNA-2 sequence : GGCCCGCCCGACCAGGCC**

**C9\_Rev\_chr3:+98241587\_NM\_001040199 : CGCCAGCCCGACCAGGCC**

**Control** CGCTCGGAACCCGCCAGCCCGACCAGCCCGGGAAGGGGGCCCC

**C9-1Δ** CGCTCGGAACCCGCCAGCCCGACCAGCCCGGGAAGGGGGCCCC

**C9-2Δ** CGCTCGGAACCCGCCAGCCCGACCAGCCCGGGAAGGGGGCCCC

**C9-3Δ** CGCTCGGAACCCGCCAGCCCGACCAGCCCGGGAAGGGGGCCCC

\*\*\*\*\*

**C9\_Rev\_chr22:-37731099 : GCCCGCTCCGCCACGCC**

**Control** TTCTTCCTGGATGCCCGCTCCGCCACGCCCAAGTTCTCCGGCA

**C9-1Δ** TTCTTCCTGGATGCCCGCTCCGCCACGCCCAAGTTCTCCGGCA

**C9-2Δ** TTCTTCCTGGATGCCCGCTCCGCCACGCCCAAGTTCTCCGGCA

**C9-3Δ** TTCTTCCTGGATGCCCGCTCCGCCACGCCCAAGTTCTCCGGCA

\*\*\*\*\*

525 **SUPPLEMENTARY FIGURE 1. A**, Repeat primed PCR data depicting the extent of G<sub>4</sub>C<sub>2</sub>  
526 repeat expansions on mutant *C9ORF72* iPSCs. **B**, Karyotype of C9-1Δ, C9-2Δ and C9-3Δ iPSC  
527 lines. **C**, C9-1Δ, C9-2Δ and C9-3Δ iPSCs expresses various pluripotency markers (Oct3/4, Tra-  
528 1-60). **D**, Sanger sequencing to analyse off-target effects of gRNAs in C9-1Δ, C9-2Δ and C9-  
529 3Δ iPSCs.  
530

## Supplementary Figure 2

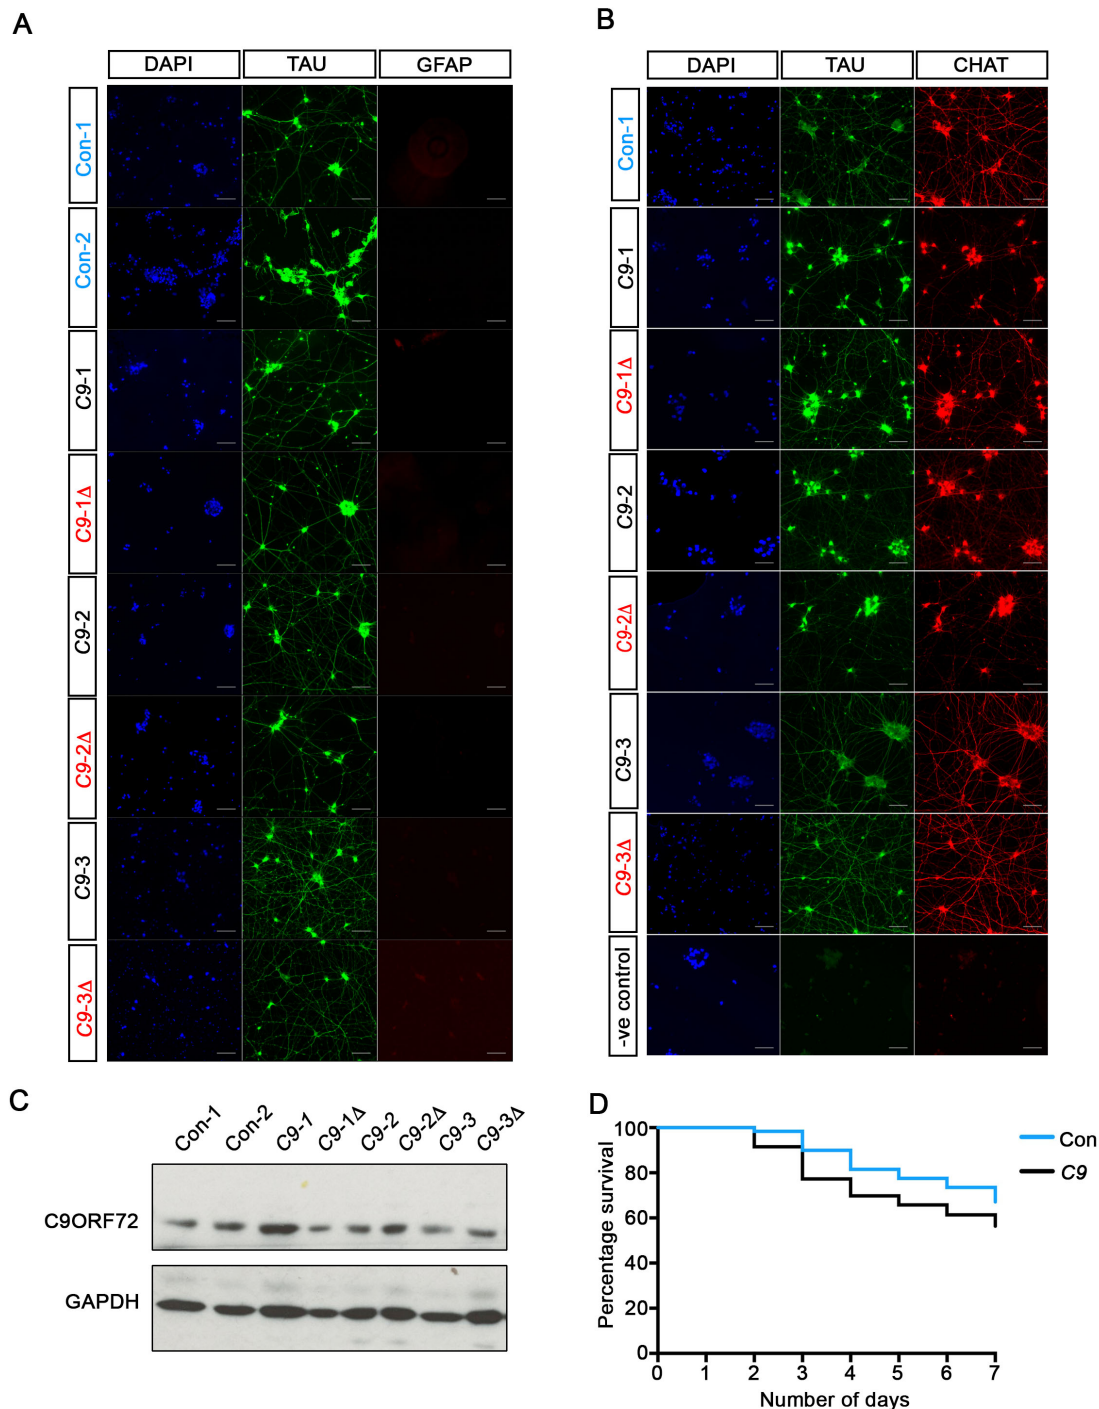

531

532

533 **SUPPLEMENTARY FIGURE 2.** **A**, Representative immunofluorescence images of MNs534 labelled with TAU (neuronal marker) and GFAP (astrocyte marker), scale bar: 50 μm). **B**,535 Representative image of CHAT immunostaining in 3 week old MNs, scale bar: 50 μm. **C**,536 Representative Western blot analysis of *C9ORF72* protein level in control, mutant *C9ORF72*537 and *C9-Δ* iPSC derived MNs. **D**, Longitudinal survival analysis of MNs derived from control538 and mutant *C9ORF72* MNs showed that the G<sub>4</sub>C<sub>2</sub> expansion repeats did not affect survival of

539 MNs. Con-1, 53.6±8.5% N=3; Con-2, 63.9±8.9% N=3; C9-1, 53.6±4.9% N=3; C9-3, 46.6±10.4% N=3 at least 35 cells per experiment

## Supplementary Figure 3

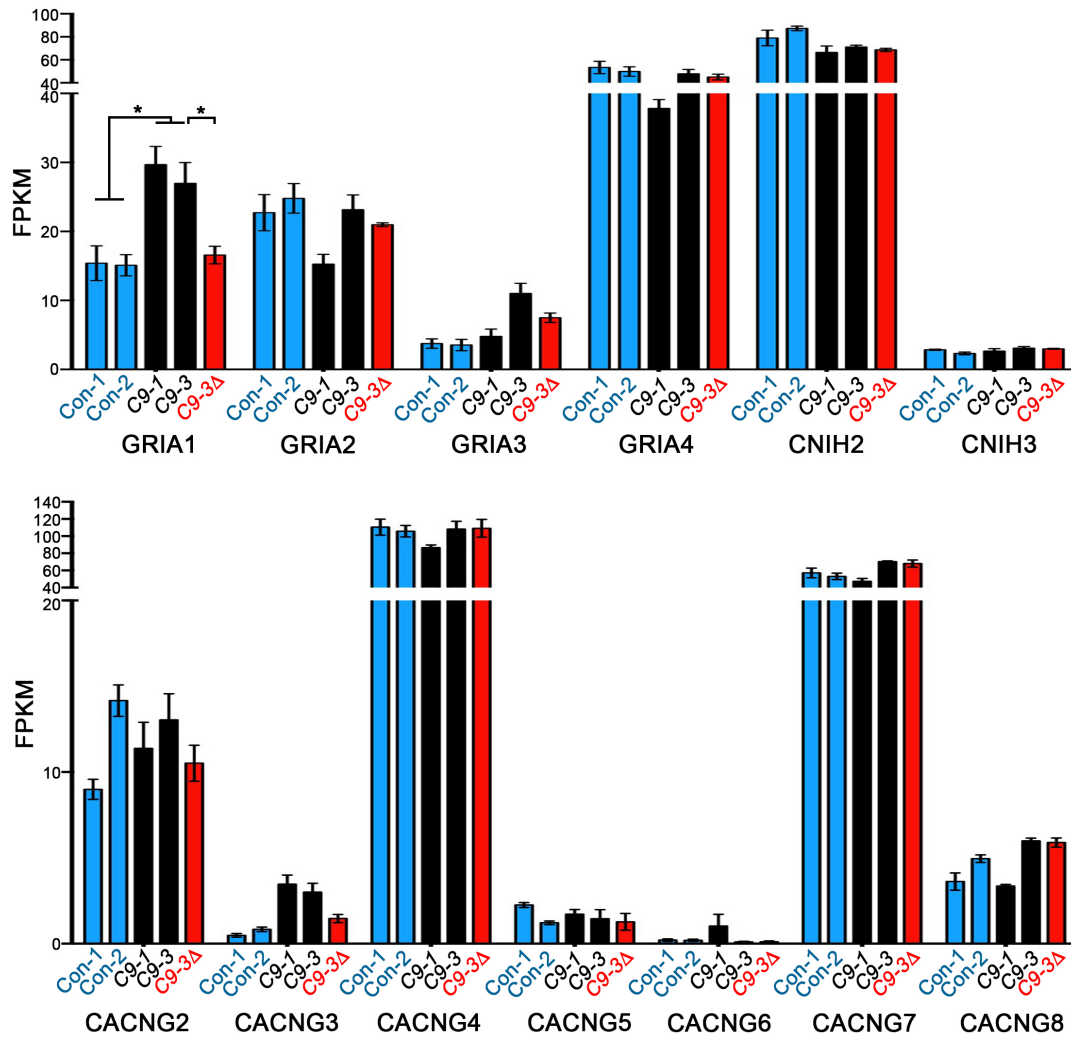

540  
541  
542  
543

**SUPPLEMENTARY FIGURE 3.** RNA-Seq analysis of AMPAR subunits and auxiliary subunits performed on 3-week old control, mutant *C9ORF72*, C9-3Δ MNs (N=3 for all genotypes).

## Supplementary Figure 4

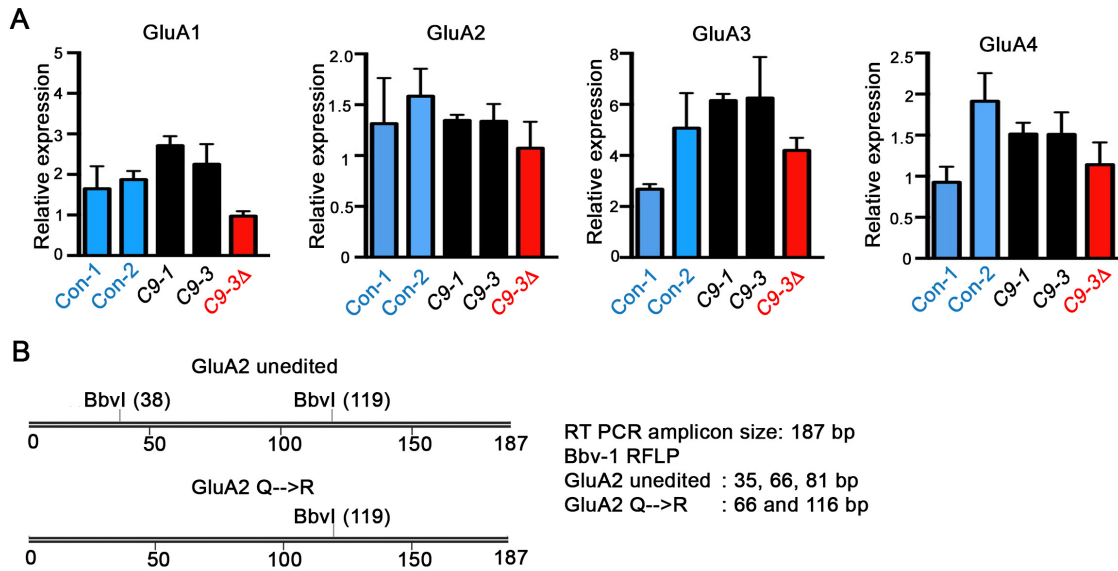

544  
 545  
 546  
 547  
 548  
 549  
 550

**SUPPLEMENTARY FIGURE 4.** **A**, Relative mRNA expression of AMPAR subunits in all cultures examined at Week 1 after differentiation. Data represented as mean  $\pm$  s.e.m, Con-1, N=3; Con-2, N=5; C9-1, N=3; C9-3, N=4; C9-3 $\Delta$ , N=4. **B**, Restriction fragment length polymorphism (RFLP) strategy to detect the GluA2 A $\rightarrow$ I mRNA post-transcriptional editing using Bbv1 endonuclease.

## Supplementary Figure 5

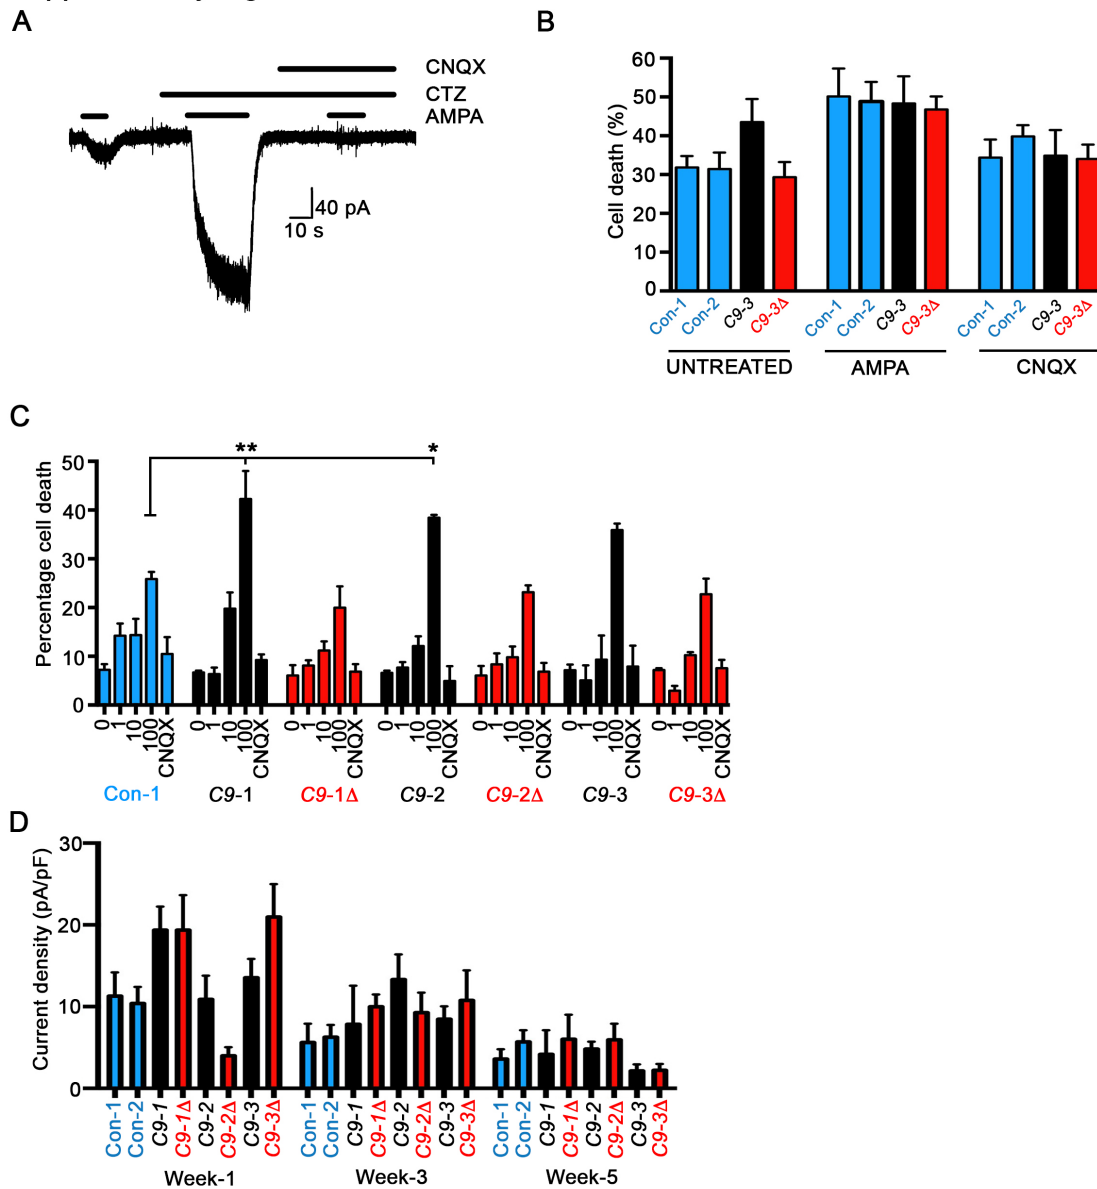

551  
 552 **SUPPLEMENTARY FIGURE 5.** A, Whole-cell voltage-clamp recording conducted at -74  
 553 mV showing the potentiation of AMPA (10  $\mu\text{M}$ )-mediated currents by cyclothiazide (10  $\mu\text{M}$ ),  
 554 an AMPAR-selective allosteric potentiator, and subsequent block by CNQX (10  $\mu\text{M}$ ). B, Mean  
 555 percentage cytotoxicity of 1 week old MNs treated with AMPA and AMPA+CNQX for 24 h.  
 556 Data represented as mean  $\pm$  s.e.m; Con-1, N=3; Con-2, N=3; C9-3, N=3; C9-3 $\Delta$ , N=3. C, Mean  
 557 percentage cell death of week 3 MNs treated with different concentrations of AMPA (in the  
 558 presence of CTZ) for 24 h. Data represented as mean  $\pm$  s.e.m; Con-1, N=3; Con-2, N=3; C9-1,  
 559 N=3; C9-1 $\Delta$ , N=3; C9-2, N=3; C9-2 $\Delta$ , N=3; C9-3, N=3; C9-3 $\Delta$ , N=3. Statistical comparisons;  
 560 one-way ANOVA with uncorrected Fisher's LSD. D, Mean AMPAR current density  
 561 measurements in all lines examined at Week 1, 3 and 5 after differentiation. For all lines at  
 562 each time point n=3-16, N=1-4. Statistical difference was not found between patient and  
 563 healthy/isogenic MNs (one-way ANOVA with Bonferroni's *post hoc* test)

564  
 565  
 566

## Supplementary Figure 6

A

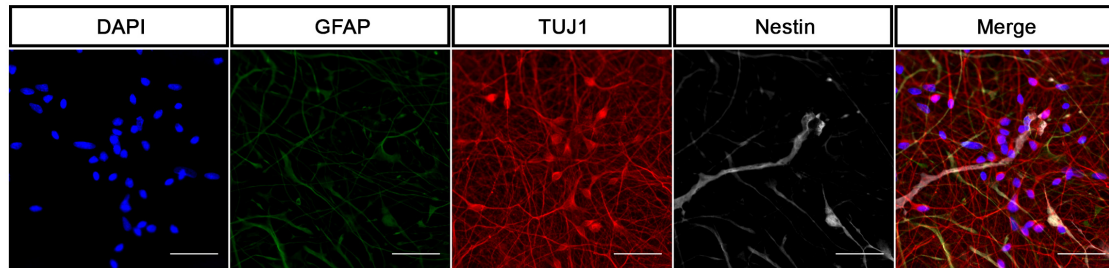

B

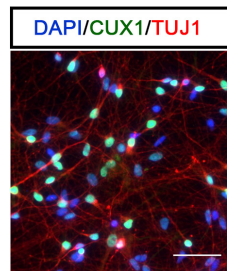

C

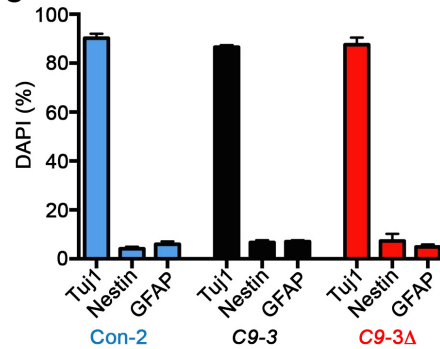

D

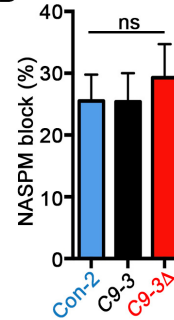

E

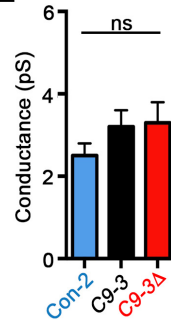

567  
568  
569  
570  
571  
572  
573  
574  
575  
576  
577

**SUPPLEMENTARY FIGURE 6.** A-B, Representative images of stainings for 5-week old iPSC derived cortical neurons with TuJ1/GFAP/Nestin (A) and CUX1/TuJ1 (B). C, Basic % TuJ1/Nestin/GFAP with respect to DAPI at 5 weeks. D, Mean percentage NASPM block of AMPA-induced currents in all cortical neurons examined at Week 5 after differentiation. No significant difference was observed between lines (data represented as mean  $\pm$  s.e.m; Con-2, n=9, N=3; C9-3, n=7, N=3; C9-3 $\Delta$ , n=8, N=3). E, Mean estimated AMPAR  $\gamma$  in all lines examined at Week 5 after differentiation. No significant difference was observed between lines (data represented as mean  $\pm$  s.e.m; Con-2, n=14, N=3; C9-3, n=17, N=3; C9-3 $\Delta$ , n=17, N=3).

## Supplementary Figure 7

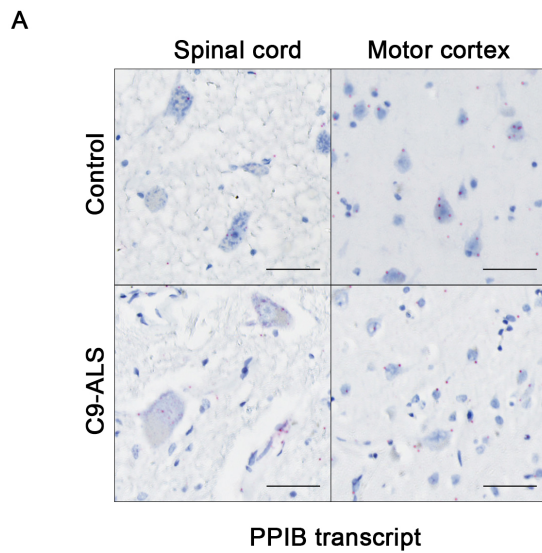

578  
579  
580  
581  
582  
583  
584

**SUPPLEMENTARY FIGURE 7. Positive control staining of PPIB in human post mortem sections.** Representative RNAScope images showing the expression of PPIB in the spinal cord and prefrontal cortex of the same patients presented in Figure 7. Scale bar, 50  $\mu$ m.

## Supplementary Figure 8

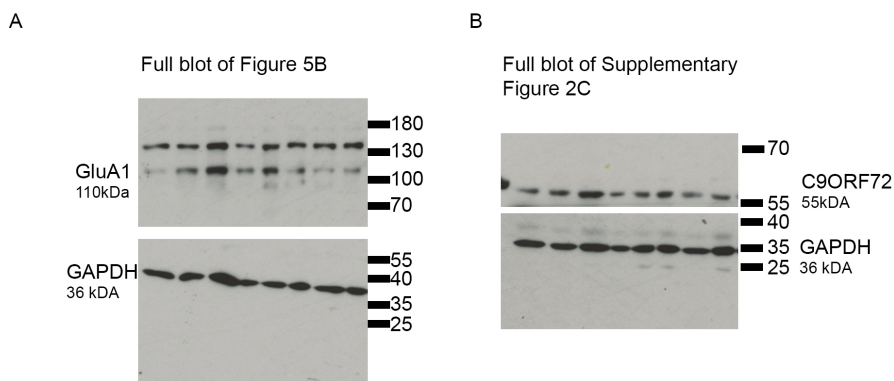

585  
586  
587

**SUPPLEMENTARY FIGURE 8.** Full blot of Figure 5B and Supplementary Figure 2C



588

589 **SUPPLEMENTARY TABLE 1: Intrinsic properties of iPSC-derived motor neurons**

| iPSC-derived line | Week | Input Resistance (MΩ)   | Resting Membrane Potential (mV) | Whole-Cell Capacitance (pF) | Frequency-Input slopes |
|-------------------|------|-------------------------|---------------------------------|-----------------------------|------------------------|
| Con-1             | 1    | 1982 ± 172              | -56.6 ± 2.1                     | 16.7 ± 1.6                  | 0.121 ± 0.07           |
|                   | 3    | 1206 ± 169 <sup>a</sup> | -55.8 ± 2.4                     | 18.5 ± 2.0                  |                        |
|                   | 5    | 701 ± 66 <sup>a,b</sup> | -60.5 ± 1.6                     | 23.0 ± 1.9                  |                        |
| Con-2             | 1    | 1456 ± 156              | -49.2 ± 2.5                     | 15.3 ± 0.8                  | 0.175 ± 0.03           |
|                   | 3    | 841 ± 88 <sup>a</sup>   | -51.6 ± 2.0                     | 20.3 ± 1.7                  |                        |
|                   | 5    | 693 ± 50 <sup>a</sup>   | -59.1 ± 21.6                    | 28.1 ± 2.1 <sup>a</sup>     |                        |
| C9-1              | 1    | 1596 ± 189              | -53.7 ± 1.9                     | 14.8 ± 1.3                  | 0.156 ± 0.03           |
|                   | 3    | 1393 ± 139              | -59.6 ± 1.9                     | 23.7 ± 2.4                  |                        |
|                   | 5    | 1003 ± 85 <sup>a</sup>  | -59.9 ± 1.4                     | 25.9 ± 2.0 <sup>a</sup>     |                        |
| C9-1Δ             | 1    | 1159 ± 96               | -39.3 ± 1.2                     | 11.8 ± 1.1                  | 0.163 ± 0.06           |
|                   | 3    | 983 ± 144               | -53.8 ± 1.9 <sup>a</sup>        | 24.4 ± 4.5 <sup>a</sup>     |                        |
|                   | 5    | 793 ± 59 <sup>a</sup>   | -52.8 ± 1.4 <sup>a</sup>        | 18.1 ± 1.4                  |                        |
| C9-2              | 1    | 1824 ± 195              | -37.8 ± 2.1                     | 19.4 ± 2.4                  | 0.136 ± 0.04           |
|                   | 3    | 801 ± 107               | -46.2 ± 3.8                     | 34.7 ± 3.4 <sup>a</sup>     |                        |
|                   | 5    | 682 ± 43 <sup>b</sup>   | -51.7 ± 2.4 <sup>a,b</sup>      | 40.7 ± 2.0 <sup>a</sup>     |                        |
| C9-2Δ             | 1    | 1406 ± 183              | -38.3 ± 2.1                     | 24.2 ± 2.3                  | 0.082 ± 0.06           |
|                   | 3    | 685 ± 97 <sup>a</sup>   | -47.9 ± 2.6                     | 29.4 ± 2.9                  |                        |
|                   | 5    | 646 ± 52 <sup>a</sup>   | -52.8 ± 1.4 <sup>a,b</sup>      | 24.1 ± 2.7                  |                        |
| C9-3              | 1    | 1854 ± 218              | -54.9 ± 2.0                     | 17.0 ± 1.2                  | 0.130 ± 0.04           |
|                   | 3    | 1335 ± 140 <sup>a</sup> | -52.2 ± 2.3                     | 16.3 ± 1.5                  |                        |
|                   | 5    | 816 ± 54 <sup>a,b</sup> | -59.1 ± 1.2 <sup>b</sup>        | 23.1 ± 1.2 <sup>a,b</sup>   |                        |
| C9-3Δ             | 1    | 2118 ± 189              | -54.7 ± 2.1                     | 12.4 ± 1.0                  | 0.221 ± 0.03           |
|                   | 3    | 959 ± 108 <sup>a</sup>  | -61.4 ± 2.7                     | 27.6 ± 3.4 <sup>a</sup>     |                        |
|                   | 5    | 757 ± 52 <sup>a</sup>   | -65.2 ± 1.1 <sup>a</sup>        | 26.9 ± 1.2 <sup>a</sup>     |                        |

590

591 **SUPPLEMENTARY TABLE 1. Intrinsic properties recorded from iPSC-derived motor**  
592 **neurons.** Mean input resistance, resting membrane potential and whole-cell capacitance data  
593 for each line obtained at weeks 1, 3 and 5. Data points were obtained from a range of 6-99 cells  
594 derived from 2-9 *de novo* batches of cells. Statistical data (one-way ANOVA with Bonferroni's  
595 *post hoc* test) presented with respect week 1 (<sup>a</sup> signifies p>0.05) and week 3 data (<sup>b</sup> signifies  
596 p>0.05). Mean frequency-input slope data for repetitively firing Week 5 cells from each iPSC-  
597 derived line. Data obtained from 3-39 cells. Statistical significance is not observed between  
598 patient versus healthy/isogenic lines (one-way ANOVA with Bonferroni's *post hoc* test).

599

600 **SUPPLEMENTARY DATA 1: List of genes that are significantly upregulated in**  
601 ***C9ORF72* mutant motor neurons (attached excel sheet)**

602

603 **SUPPLEMENTARY DATA 2: List of genes that are significantly downregulated in**  
604 ***C9ORF72* mutant motor neurons (attached excel sheet)**
