# Supplementary material for: C9ORF72 repeat expansion causes vulnerability of motor neurons to Ca2+-permeable AMPA receptor-mediated excitotoxicity
Source: PubMed Central journal article supplement (PMC5783946; doi:10.1038/s41467-017-02729-0), 2018-01-24
Supplement: 41467_2017_2729_MOESM2_ESM.pdf [file 41467_2017_2729_MOESM2_ESM.pdf]

## **Description of Additional Supplementary Files**

File Name: Supplementary Data 1

Description: List of genes that are significantly upregulated in C9ORF72 mutant motor neurons.

File Name: Supplementary Data 2

Description: List of genes that are significantly downregulated in C9ORF72 mutant motor neurons.
